# Supplementary material
Source: PubMed Central journal article supplement (PMC4060719)
Supplement: 1322723111_pnas.201322723SI.pdf [file 1322723111_pnas.201322723SI.pdf]

# Supporting Information

Stiner et al. 10.1073/pnas.1322723111

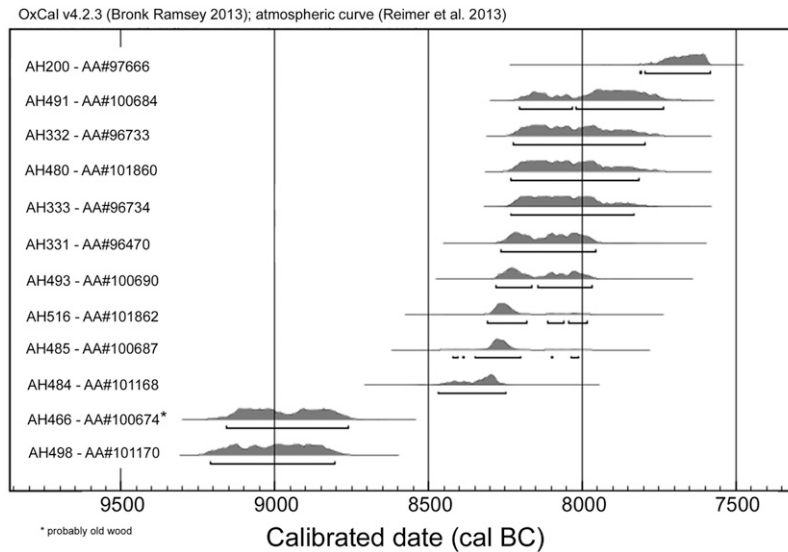

**Fig. S1.** Plot of radiocarbon results (cal B.C.) from combustion and other short-lived features in upper Level 4 of Aşıklı Höyük (AH) [OxCal v4.2.3 (1, 2)]. Note that most determinations are for the uppermost part of Level 4 in Trench 4GH on the north side of the mound, whereas the oldest determination (AA# 101170, from provisionally named Level 5) is for a sample obtained near the base of the mound in Trench 2J on the western slope. Brackets below each distribution (\_\_\_\_) signify 95% confidence interval.

1. Bronk Ramsey C (2009) Bayesian analysis of radiocarbon dates. *Radiocarbon* 51(1):337–360.

2. Reimer PJ, et al. (2013) IntCal13 and Marine13 radiocarbon age calibration curves 0–50,000 years cal BP. *Radiocarbon* 55(4):1869–1887.

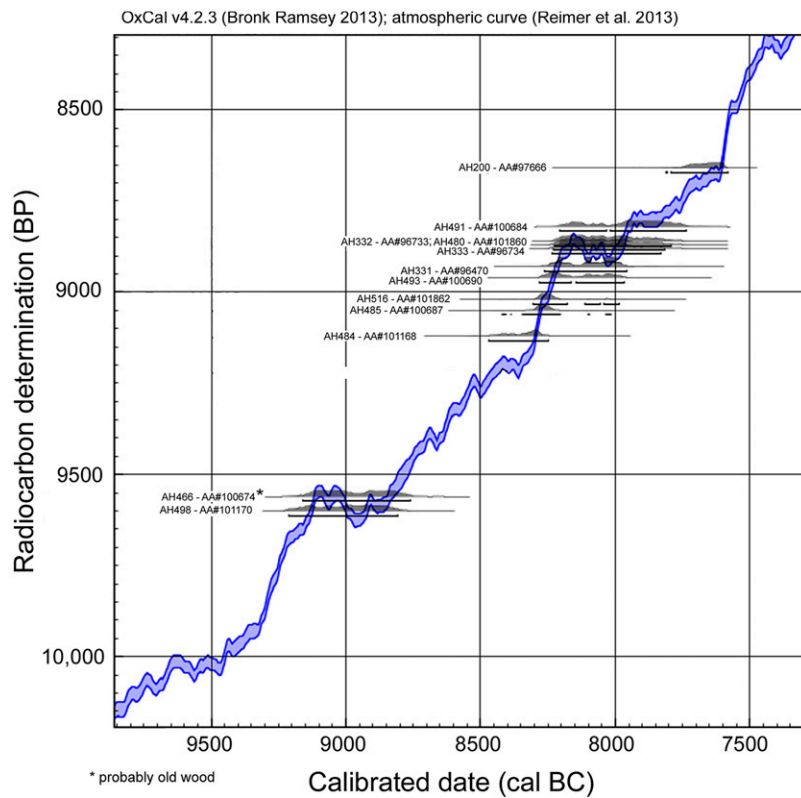

**Fig. S2.** Radiocarbon results from combustion and other short-lived features within Level 4 of AH plotted on OxCal v4.2.3 calibration curve (1, 2). Note that most of the currently available determinations are for uppermost Level 4 in Trench 4GH, whereas the oldest determination (AA# 101170) is for a sample obtained near the base of the mound on the western slope (Trench 2J).

1. Bronk Ramsey C (2009) Bayesian analysis of radiocarbon dates. *Radiocarbon* 51(1):337–360.
2. Reimer PJ, et al. (2013) IntCal13 and Marine13 radiocarbon age calibration curves 0-50,000 years cal BP. *Radiocarbon* 55(4):1869–1887.

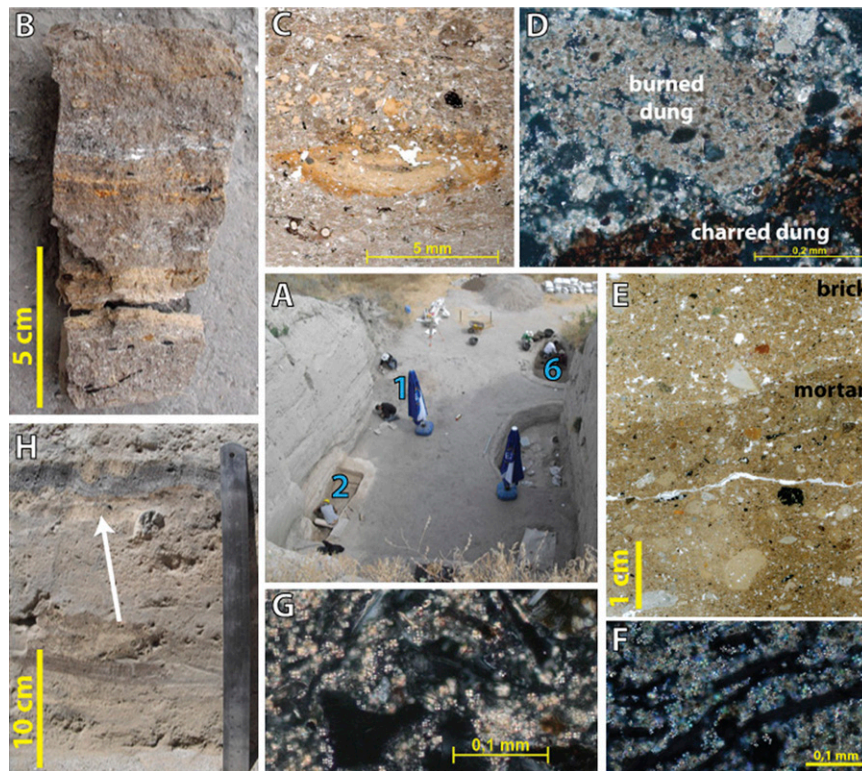

**Fig. S3.** Geoarchaeological evidence of primary dung deposits and secondary uses of dung in upper Level 4. (A) View of the Deep Trench (4GH) on the northern end of the mound, with excavators uncovering several open spaces and structures within upper Level 4. The locations of different types of dung deposits are indicated by architectural feature numbers. Space 1 contains intact layers of dung, and is underlain by spaces 7 and 13, which also contain sporadic but intact dung. Building 6 contains burned dung within its hearth and occupation deposits. Dung is also present in the mortar of the building's walls. Building 2 contains an intact layer of dung located above a floor. (B) Detail of dung layers in a micromorphology block collected from just above space 1. The dung appears orange and fibrous in the field, with numerous visible phytoliths. Field analyses of these types of layers include observations of color, reaction to acid, and smear slide production. Smear slides of dung deposits such as this one contain abundant phytoliths and spherulites. (C) Photomicrograph of the sample in B. Concentrations of yellow-orange secondary phosphate minerals are visible. These minerals form as a result of decomposition of the dung and contribute to the orange color that is visible in the field. Plane-polarized light. (D) Photomicrograph of burned and charred dung from the hearth in Building 6. When dung is burned under reducing conditions, the optical properties of the spherulites become altered. The dung was used as fuel within the structure, as evidenced by its presence within the hearth, as well as within generalized occupation debris. Cross-polarized light. (E) Incident light scan of a sample of brick and mortar from Building 6. The mortar was produced from anthropogenic refuse and contains aggregates of construction materials, ashes, fragments of charcoal, hackberry seeds, and dung (burned and not burned). (F) Intact dung from the upper Level 4 midden (location not visible in A). Intact dung is evidenced by interbedded phytoliths (here, black areas) and spherulites (light areas) with an overall undulating and laminated fabric (1). Relative to the dung in C, this dung is less affected by postdepositional decomposition, as evidenced by lower abundance of secondary phosphates and preservation of calcium oxalate crystals. Cross-polarized light. (G) Photomicrograph of a dense dung layer within Building 2. The light areas are concentrations of dung spherulites. The presence of only localized undulating laminated fabric indicates that this deposit may be in secondary position, or reworked in place. Cross-polarized light. (H) The dung layer from G located above a series of plaster floors in Building 2. The dung (arrow) is overlain by a deposit containing charred plant fibers and phytoliths.

1. Shahack-Gross R, Finkelstein I (2008) Subsistence practices in an arid environment: A geoarchaeological investigation in an Iron Age site, the Negev Highlands, Israel. *J Archaeol Sci* 35(4):965–982.

Table S1. Recently obtained radiocarbon results on burnt plant materials from discrete short-lived (mainly combustion) features in AH in Trenches 4GH (deep sounding in the northern area of the mound) and 2J on the western slope

| UA Laboratory AA no. | AH project sample no. | Trench | Unit | Feature | Space | Building | Context description              | Level             | Elevation | Material            | Context type       | $^{14}\text{C}$ yrs $\pm$ | cal B.P. cal B.C. $\pm$ | $2\sigma$ | Range |        |        |
|----------------------|-----------------------|--------|------|---------|-------|----------|----------------------------------|-------------------|-----------|---------------------|--------------------|---------------------------|-------------------------|-----------|-------|--------|--------|
| AA101180             | 509                   | 2J     | 570  | 371     | 138   | 17       | Hearth                           | 2/3               | 8.49      | Charcoal            | Hearth             | 8860                      | 9970                    | 8020      | 210   | 10,172 | 9,760  |
| AA101182             | 511                   | 2J     | 550  | 331     | —     | —        | Fire installation                | 3                 | 8.84      | Charcoal            | Combustion feature | 8830                      | 9930                    | 7980      | 230   | 10,156 | 9,698  |
| AA101183             | 512                   | 2J     | 550  | 331     | —     | —        | Fire installation                | 3                 | 8.84      | Charcoal            | Combustion feature | 8790                      | 9870                    | 7920      | 270   | 10,135 | 9,601  |
| AA100674             | 466                   | 2J     | 551  | 332     | 128   | 18       | Reed floor                       | 3                 | 9.01      | Burned roof timber* | Burned layer       | 9560                      | 10920                   | 8970      | 220   | 11,136 | 10,701 |
| AA101178             | 507                   | 2J     | 587  | 372     | 134   | 18       | Hearth                           | 3                 | 9.91      | Hearth charcoal     | Hearth             | 8710                      | 9690                    | 7740      | 140   | 9,824  | 9,546  |
| AA101177             | 506                   | 2J     | 598  | —       | —     | —        | Hearth                           | 3                 | 10.14     | Hearth charcoal     | Hearth             | 9010                      | 10090                   | 8140      | 160   | 10,249 | 9,929  |
| AA101172             | 501                   | 2J     | 584  | —       | —     | —        | West profile, major burn layer   | 3                 | 10.31     | Charcoal            | Burned layer       | 8900                      | 10050                   | 8040      | 160   | 10,196 | 9,886  |
| AA101173             | 502                   | 2J     | 584  | —       | —     | —        | West profile, major burn layer   | 3                 | 10.31     | Burnt dung          | Burned layer       | 8870                      | 9980                    | 8030      | 210   | 10,179 | 9,766  |
| AA101176             | 505                   | 2J     | 598  | —       | —     | —        | Hearth                           | 3                 | 10.31     | Hearth charcoal     | Bearth             | 8900                      | 10050                   | 8100      | 160   | 10,196 | 9,886  |
| AA101181             | 510                   | 2J     | 585  | 366     | 136   | 20       | Hearth                           | 3                 | 10.8      | Hearth charcoal     | Hearth             | 8720                      | 9690                    | 7740      | 140   | 9,834  | 9,550  |
| AA101170             | 498                   | 2J     | 584  | —       | —     | —        | West profile, major burn layer   | base <sup>†</sup> | 11.67     | Charcoal            | Burned layer       | 9600                      | 10960                   | 9010      | 200   | 11,160 | 10,756 |
| AA100684             | 491                   | 4GH    | 249  | —       | —     | —        | South wall, burnt dung           | 3/4               | 8.52      | Burnt dung          | Burned layer       | 8820                      | 9930                    | 7980      | 240   | 10,156 | 9,686  |
| AA100690             | 493                   | 4GH    | 255  | 84      | 15    | 1        | Burial 131                       | 4                 | 10.73     | Charcoal            | Burial             | 8960                      | 10080                   | 8130      | 160   | 10,228 | 9,916  |
| AA97666              | 200                   | 4GH    | 105  | 32      | 5     | 3        | Fire installation                | 4                 | 11.19     | Seed                | Combustion feature | 8660                      | 9640                    | 7690      | 110   | 9,532  | 9,744  |
| AA96733              | 332                   | 4GH    | 154  | 51      | 2     | —        | Fire installation                | 4                 | 11.35     | Charcoal residue    | Combustion feature | 8860                      | 9970                    | 8020      | 210   | 9,760  | 10,172 |
| AA100687             | 485                   | 4GH    | 227  | 73      | 2     | —        | Fire installation                | 4                 | 11.46     | Hearth charcoal     | Combustion feature | 9050                      | 10220                   | 8270      | 70    | 10,297 | 10,151 |
| AA101862             | 516                   | 4GH    | 227  | 73      | 2     | —        | Fire installation                | 4                 | 11.46     | Charcoal            | Combustion feature | 9020                      | 10090                   | 8140      | 160   | 10,254 | 9,933  |
| AA101168             | 484                   | 4GH    | 251  | —       | —     | —        | N of space 13, burnt phytol area | 4                 | 11.69     | Charcoal            | Burned layer       | 9120                      | 10310                   | 8360      | 110   | 10,416 | 10,197 |
| AA101860             | 480                   | 4GH    | 157  | 53      | 6     | 6        | Base of Building 6               | 4                 | 12.39     | Burnt layer         | Build-fill-base    | 8870                      | 10370                   | 8420      | 130   | 10,493 | 10,238 |
| AA96734              | 333                   | 4GH    | 149  | 49      | 6     | 6        | Hearth                           | 4                 | 12.51     | Charcoal            | Hearth             | 8880                      | 10020                   | 8070      | 160   | 10,182 | 9,856  |
| AA96470              | 331                   | 4GH    | 149  | 49      | 6     | 6        | Hearth                           | 4                 | 12.52     | Charcoal residue    | Hearth             | 8930                      | 10070                   | 8120      | 160   | 10,216 | 9,905  |

Results include samples from the lower part of Level 2, selected locations in Level 3 and uppermost Level 4 (key information color-highlighted), and one collected near the base of the mound on the western slope (Trench 2J).

\*Early date in this instance probably reflects old wood problem.

<sup>†</sup>Sample taken from feature near base of cultural stratigraphy on the western side of the mound; this deposit is provisionally named Level 5.

**Table S2. Relative abundance (number of identified skeletal specimens, NISP) of major taxonomic groups by level and level subsection in AH**

| Taxon                              | 2A    | 2B    | 2C    | 2D    | 2E    | 2F    | 2G    | 2H    | 2I  | 2J     | 3A    | 3B  | 3C    | 3E  | 4a-4c | 4d    | 4e    |
|------------------------------------|-------|-------|-------|-------|-------|-------|-------|-------|-----|--------|-------|-----|-------|-----|-------|-------|-------|
| Toads/frogs (Anura)                | —     | 6     | 12    | 3     | —     | —     | —     | 1     | 1   | 5      | 8     | 6   | —     | 8   | 89    | 78    | 96    |
| Mice/voles (Rodentia)              | —     | 37    | —     | 9     | —     | —     | —     | 1     | 15  | 40     | 90    | 5   | —     | —   | 178   | 38    | 24    |
| Carp (Pisces)                      | —     | 5     | 2     | 36    | 4     | —     | —     | —     | 62  | 513    | 346   | 30  | 216   | 44  | 886   | 429   | 377   |
| Hedgehog ( <i>Erinaceus</i> )      | —     | —     | —     | —     | —     | —     | —     | —     | —   | —      | —     | —   | 3     | —   | 56    | 56    | 51    |
| Tortoises/turtles (Chelonians)     | —     | 4     | 2     | 7     | 4     | 5     | 1     | 3     | —   | 14     | 2     | 1   | 10    | 1   | 163   | 105   | 165   |
| Hare ( <i>Lepus capensis</i> )     | 3     | 34    | 259   | 146   | 147   | 115   | 49    | 54    | 6   | 558    | 50    | 7   | 339   | 62  | 1,717 | 899   | 1507  |
| Birds (Aves)                       | 1     | 5     | 17    | 10    | 16    | 13    | 2     | 11    | —   | 9      | 4     | —   | 2     | —   | 66    | 46    | 64    |
| Horse/wild ass (Equidae)           | 3     | 31    | 67    | 45    | 16    | 86    | 44    | 28    | 10  | 370    | 12    | 16  | 38    | 10  | 139   | 114   | 180   |
| Deer (3 species, Cervidae)         | 7     | 24    | 66    | 32    | 20    | 70    | 39    | 11    | 2   | 539    | 6     | 3   | 28    | 15  | 67    | 40    | 96    |
| Aurochs ( <i>Bos primigenius</i> ) | 139   | 219   | 689   | 364   | 175   | 411   | 217   | 123   | 27  | 1,961  | 123   | 23  | 30    | 13  | 306   | 212   | 823   |
| Pig ( <i>Sus scrofa</i> )          | 13    | 18    | 40    | 78    | 53    | 177   | 128   | 46    | 6   | 372    | 20    | 7   | 70    | 14  | 168   | 138   | 260   |
| Goat ( <i>Capra aegagrus</i> )     | 172   | 171   | 295   | 209   | 111   | 320   | 193   | 52    | 5   | 253    | 19    | 3   | 17    | 4   | 128   | 133   | 55    |
| Sheep/goat (Caprini)               | 1,286 | 1,990 | 4,743 | 4,470 | 1,311 | 4,397 | 1,770 | 412   | 104 | 11,104 | 431   | 132 | 898   | 168 | 2,909 | 1,706 | 1,576 |
| Sheep ( <i>Ovis orientalis</i> )   | 381   | 501   | 1,328 | 1,118 | 434   | 1,450 | 937   | 260   | 29  | 1,460  | 135   | 30  | 45    | 51  | 414   | 254   | 176   |
| Carnivores (Carnivores)            | —     | 8     | 14    | 35    | 20    | 42    | 12    | 7     | 1   | 68     | 5     | —   | 36    | 3   | 224   | 181   | 197   |
| Total NISP                         | 2,005 | 3,053 | 7,534 | 6,562 | 2,311 | 7,086 | 3,392 | 1,009 | 268 | 17,266 | 1,251 | 263 | 1,732 | 393 | 7,510 | 4,429 | 5,647 |

Note that Level 4a-d corresponds to the upper part of the Level 4, and 4e represents the upper-middle part of Level 4. Data are for faunal samples excavated through the 2013 field season.

**Table S3. Summary of fusion states of tibiae and metapodials by ungulate taxon**

| Taxon      | % Juveniles | % Adults | Element-end (MNE)       |
|------------|-------------|----------|-------------------------|
| Equidae    | 40          | 60       | Distal tibia (10)       |
| <i>Bos</i> | 53          | 47       | Distal tibia (19)       |
| Caprines*  | 69          | 31       | Distal metapodials (71) |
| <i>Sus</i> | 26          | 74       | Distal metapodials (22) |

Percentages of juvenile (including infants) versus adults by ungulate taxonomic group in upper Level 4, based on limb bone fusion at or near the time of the deciduous-permanent premolar replacement boundary. MNE, minimum number of elements.

\*Caprine limb fusion estimate excludes fetal bones.

**Table S4. Raw and percentage data for caprine bone fusion by element and element-portion from the uppermost and mid-upper parts of Level 4, with very young (fetus and neonate combined) specimens listed separately**

| Element-portion         | MNE fused | MNE unfused | MNE fetus-neon | total MNE | % MNE fused | % MNE unfused | % MNE fetus-neon | Sample source from within Level 4 |
|-------------------------|-----------|-------------|----------------|-----------|-------------|---------------|------------------|-----------------------------------|
| Phalanx 1 – proximal    | 55        | 34          | 4              | 93        | 59          | 37            | 4                | Uppermost                         |
| Innominate – acetilium  | 28        | 14          | 7              | 49        | 57          | 29            | 14               | Uppermost                         |
| Tibia – distal          | 39        | 23          | 3              | 65        | 60          | 35            | 5                | Uppermost                         |
| Metapodial – distal     | 15        | 27          | 11             | 53        | 28          | 51            | 21               | Uppermost                         |
| Calcaneum – tuber calc. | 21        | 33          | 1              | 55        | 38          | 60            | 2                | Uppermost                         |
| Femur – proximal        | 9         | 26          | 8              | 43        | 21          | 60            | 19               | Uppermost                         |
| Tibia – proximal        | 12        | 24          | 3              | 39        | 31          | 61            | 8                | Uppermost                         |
| Radius – distal         | 13        | 24          | 6              | 43        | 30          | 56            | 14               | Uppermost                         |
| Phalanx 1 – proximal    | 28        | 12          | 1              | 41        | 68          | 29            | 3                | Mid-upper                         |
| Innominate – acetilium  | 13        | 5           | 3              | 21        | 62          | 24            | 14               | Mid-upper                         |
| Tibia – distal          | 14        | 13          | 1              | 28        | 50          | 46            | 4                | Mid-upper                         |
| Metapodial – distal     | 7         | 14          | 2              | 23        | 30          | 61            | 9                | Mid-upper                         |
| Calcaneum – tuber calc. | 4         | 17          | 0              | 21        | 19          | 81            | 0                | Mid-upper                         |
| Femur – proximal        | 4         | 6           | 1              | 11        | 36          | 55            | 9                | Mid-upper                         |
| Tibia – proximal        | 6         | 11          | 1              | 18        | 33          | 61            | 6                | Mid-upper                         |
| Radius – distal         | 7         | 16          | 3              | 26        | 27          | 62            | 11               | Mid-upper                         |

Percentages of juveniles (including infants) versus adults by ungulate taxonomic group in upper Level 4, based on limb bone fusion at or near the time of the deciduous-permanent premolar replacement boundary.

**Table S5. Analysis of the distributions of fetal versus neonate specimens by ungulate taxon in upper Level 4**

| Taxon      | NISP fetus | NISP neonate | NISP (undetermined)<br>fetus or neonate | <i>N</i> | <i>P</i> <sup>*</sup> | <i>P</i> <sup>†</sup> |
|------------|------------|--------------|-----------------------------------------|----------|-----------------------|-----------------------|
| Equidae    | 0          | 10           | 2                                       | 12       | 0.144                 | 0.021                 |
| <i>Bos</i> | 0          | 18           | 3                                       | 21       | 0.034                 | 0.001                 |
| Caprines   | 30         | 64           | 107                                     |          |                       |                       |
| <i>Sus</i> | 0          | 22           | 4                                       | 26       | 0.015                 | <0.001                |
| Cervidae   | 0          | 0            | 0                                       |          |                       |                       |

*N*, hypothetical sample of size;  $P^* = (1 - 0.149)^N$  or  $(0.851)^N$ ;  $P^\dagger = (1 - 0.319)^N$  or  $(0.681)^N$ . Neonate specimens were distinguished whenever possible from fetal specimens based on known age reference skeletons. Among the caprines from the upper part of Level 4, there are 201 bones attributable to either fetal or neonate individuals. Of these, definitively fetal bones constitute 14.93% ( $n = 30$ ). Of the remainder, 64 (31.8%) are clearly neonates, and for another 107 very young specimens (53.2%) it is impossible to determine whether they are neonate or fetal. There are no unambiguous fetal bones found in the assemblage for any of the other taxa. Because we cannot use a  $\chi^2$  to evaluate differences among them as a result of the large number of empty cells in the data, we instead turn to simple probabilities. The question is whether the absence of fetal bones for Equids, *Bos*, and *Sus* demonstrate that they are sampling a different population of age groups than the caprines (the baseline for this comparison), or whether this could simply be an effect of smaller sample sizes. Assuming an actual frequency of fetal bones at 14.9% of the combined fetal+neonate sample, we can calculate the probability of selecting a hypothetical sample of size *N* in which there are no fetal bones. This is the same as 1 - (probability of selecting only neonate or indeterminate bones). Note that there are neither fetal nor neonate bones for cervids, so no calculation is possible for this taxonomic group. The results presented above show that it is very unlikely that the absence of fetal bones in the samples of *Bos* and *Sus* is a result of sampling error alone. Because of the smaller number of Equid bones available for study, we cannot be certain that the absence of fetal specimens is not a sampling effect, although there is only a 14.4% chance that this is the explanation.

\*Results for all three categories: fetus, neonate, and underdetermined fetus-neonate.

†Results for only two categories: fetus, neonate (excludes underdetermined fetus-neonate specimens).

**Table S6. Dental-based age profile calculations and results for AH upper Level 4 caprines following Payne's (1) mandibular age stages (MNE = 82), and adjusted using the technique described by Helmer et al. (2) to include isolated tooth specimens**

| AH Level 4 Caprine dental age structure following Payne (1) | A (0–2 mo) | B (2–6 mo) | C (6–12 mo) | D (1–2 y) | E and F (2–4 y) | G (4–6 y) | H and I (6–10 y) |
|-------------------------------------------------------------|------------|------------|-------------|-----------|-----------------|-----------|------------------|
| Raw counts (MNE)                                            | 2          | 3          | 13          | 16        | 0               | 0         | 0                |
| Proportionally assigned                                     | 0          | 1.2        | 6.2         | 3.7       | 20.76           | 6.37      | 9.78             |
| Corrected (raw+prop assign)                                 | 2          | 4.2        | 19.2        | 19.7      | 20.76           | 6.37      | 9.78             |
| % total MNE                                                 | 2          | 6          | 23          | 24        | 25              | 8         | 12               |

1. Payne S (1973) Kill-off patterns in sheep and goats: The mandibles from Asvan Kale. *Anatolian Studies* 23:281–303.

2. Helmer D, Gourichon L, Vila E (2007) The development of the exploitation of products from *Capra* and *Ovis* (meat, milk, and fleece) from the PPNB to the Early Bronze Age in the northern Near East (8700-9200 cal BP). *Anthropozoologica* 42(2):41–69.

**Table S7. Data and Kolmogorov–Smirnov test results for comparisons of caprine survivorship based on dental results for upper Level 4 (all units combined) to Epipaleolithic (EPI) and other PPN cases from other sites**

| Site and component | Period     | Source                           | <i>n</i> specimens | A | B  | C  | D  | EF | G  | HI | <i>D</i> value | df      | 0.05 Rejection threshold | <i>P</i> |
|--------------------|------------|----------------------------------|--------------------|---|----|----|----|----|----|----|----------------|---------|--------------------------|----------|
| Aşıklı Level 4     | Early PPN  | –                                | 82                 | 2 | 4  | 19 | 20 | 21 | 6  | 10 | –              | –       | –                        | –        |
| Göbekli Tepe*      | PPNA       | Peters et al. (1)                | 48                 | 0 | 0  | 7  | 18 | 20 | 2  | 1  | 0.159          | 82, 48  | 0.247                    | >0.05    |
| Cafer Höyük        | Early PPNB | Helmer (2)                       | 21                 | 0 | 0  | 8  | 4  | 5  | 2  | 2  | 0.076          | 82, 21  | 0.333                    | >0.05    |
| Cafer Höyük        | Mid-PPNB   | Helmer (2)                       | 176                | 0 | 3  | 43 | 28 | 53 | 38 | 11 | 0.128          | 82, 176 | 0.182                    | >0.05    |
| Aswad              | Mid-PPNB   | Helmer and Gourichon (3)         | 97                 | 0 | 1  | 25 | 21 | 27 | 14 | 9  | 0.064          | 82, 97  | 0.204                    | >0.05    |
| Tell Halula 5      | Mid-PPNB   | Sana Segui, in Helmer et al. (4) | 133                | 9 | 12 | 39 | 30 | 25 | 14 | 4  | 0.146          | 82, 133 | 0.191                    | >0.05    |
| Karain B 1         | EPI        | Atıcı 2009                       | 93                 | 0 | 16 | 11 | 18 | 21 | 25 | 2  | 0.100          | 93, 82  | 0.206                    | >0.05    |
| Karain B 2         | EPI        | Atıcı 2009                       | 46                 | 0 | 4  | 11 | 7  | 12 | 11 | 1  | 0.100          | 46, 82  | 0.25                     | >0.05    |
| Öküzini 2          | EPI        | Atıcı 2009                       | 85                 | 1 | 10 | 17 | 10 | 24 | 20 | 3  | 0.101          | 85, 82  | 0.211                    | >0.05    |
| Öküzini 3          | EPI        | Atıcı 2009                       | 40                 | 2 | 9  | 8  | 3  | 7  | 10 | 1  | 0.201          | 40, 82  | 0.262                    | >0.05    |

\*Values had to be estimated from published graphs, as primary data not given.

- Peters J, Buitenhuis H, Grupe G, Schmidt K, Pöllath N (2013) *The Origins and Spread of Domestic Animals in Southwest Asia and Europe*, eds Colledge S, et al. (Left Coast Press, Walnut Creek, CA), pp 83–114.
- Helmer D (2008) in *Archaeozoology of the Near East VIII: Proceedings of the 8th International Symposium on the Archaeozoology of Southwestern Asia and Adjacent Areas*, eds Vila E, et al. (Maison de l'Orient et de la Méditerranée, Lyon), pp 169–195.
- Helmer D, Gourichon L (2008) in *Archaeozoology of the Near East VIII: Proceedings of the 8th International Symposium on the Archaeozoology of Southwestern Asia and Adjacent Areas*, eds Vila E, et al. (Maison de l'Orient et de la Méditerranée, Lyon), pp 120–151.
- Helmer D, Gourichon L, Vila E (2007) The development of the exploitation of products from *Capra* and *Ovis* (meat, milk, and fleece) from the PPNB to the Early Bronze Age in the northern Near East (8700–9200 cal BP). *Anthropozoologica* 42(2):41–69.

**Table S8. Micromorphology observations on 24 samples from Trench 4GH, collected from upper Level 4 during active excavations and from the contact between Levels 4 and 3 exposed in profiles from previous excavations**

| Architectural feature | Context                                     | Level | No. samples | Intact dung?                                                                                                                           | Reworked dung?                                                                                             | Interpretation                                                                                                                                                                                                            |
|-----------------------|---------------------------------------------|-------|-------------|----------------------------------------------------------------------------------------------------------------------------------------|------------------------------------------------------------------------------------------------------------|---------------------------------------------------------------------------------------------------------------------------------------------------------------------------------------------------------------------------|
| Building 6            | Hearth                                      | 4     | 1           | No                                                                                                                                     | Yes, abundant and burned (Fig. S3D)                                                                        | Dung was used as fuel                                                                                                                                                                                                     |
| Building 6            | Mortar                                      | 4     | 1           | No                                                                                                                                     | Yes, low abundance (Fig. S3E)                                                                              | Dung was incorporated into mortar with other anthropogenic refuse                                                                                                                                                         |
| Building 6            | Occupation debris on top of floors          | 4     | 2           | No                                                                                                                                     | Yes, low abundance, burned and not burned                                                                  | Dung was brought into the structure for use as fuel and was deposited on top of the floors along with other materials                                                                                                     |
| Building 3            | Mortar                                      | 4     | 1           | No                                                                                                                                     | Yes, low abundance                                                                                         | Dung was incorporated into mortar with other anthropogenic refuse                                                                                                                                                         |
| Building 3            | Occupation debris and fill on top of floors | 4     | 3           | No                                                                                                                                     | Yes, low abundance                                                                                         | Dung was brought into the structure for use as fuel and was deposited on top of the floors along with other materials; mortar containing dung became incorporated into fill                                               |
| Building 2            | Occupation debris and fill on top of floors | 4     | 3           | Localized (mm-scale)                                                                                                                   | Yes, high abundance in discrete layer (7–10 mm thick, Fig. S3 G and H), absent from generalized fill       | Dung was used as a floor covering or surface within the structure; or dung was deposited as a result of stabling within the structure and became reworked in place                                                        |
| Building 2            | Mortar                                      | 4     | 1           | No                                                                                                                                     | No                                                                                                         | Dung was not incorporated into the mortar in this building                                                                                                                                                                |
| Spaces 1, 7, 13       | Open space, activity areas                  | 4     | 5           | Yes, thin layers (mm-scale), variable degree of decomposition, interbedded with other materials                                        | Yes, mixed into general anthropogenic debris                                                               | Spaces 1 and 7 were used extensively as work areas based on artifactual evidence; livestock periodically (briefly) were kept in the open spaces as well; space 13 mainly fill but patches of intact dung residues present |
| Space 1               | Post mold                                   | 4     | 1           | Yes, discrete layers filling a post mold                                                                                               | Yes, mixed into general anthropogenic debris                                                               | The open space was partially covered; upon removal of the post, livestock periodically were kept here                                                                                                                     |
| Above space 1         | Open space, midden                          | 4/3   | 1           | Yes, multiple thick layers (totaling 7+ cm thickness, lateral extent of multiple meters, Fig. S3 B and C), highly decomposed           | Yes, mixed into general anthropogenic debris interbedded with intact dung                                  | Livestock were kept in this area; increase in abundance of animals or duration of penning relative to earlier phases (spaces 1–13)                                                                                        |
| Midden area           | Open space, midden                          | 4/3C  | 1           | Yes, one thick layer (7 cm) (Fig. S3F), good preservation                                                                              | No                                                                                                         | Livestock were kept in this area                                                                                                                                                                                          |
| Midden area           | Open space, midden                          | 4/3C  | 1           | No                                                                                                                                     | Yes, burned and in layer containing charcoal, ashes and food debris; as clumps in other refuse, not burned | Dumping of hearth contents in the midden; use of dung as fuel; aggregates of dung in refuse                                                                                                                               |
| Midden area           | Open space, midden                          | 3E/3D | 2           | Yes, one burned layer (5 mm) containing charred plant fibers, phytoliths and spherulites, multiple layers, not burned (totaling 3+ cm) | Yes, burned and in layer containing charcoal, ashes and food debris                                        | Use of midden area for keeping livestock, with occasional burning of the dung in place; dumping of hearth contents in the midden; use of dung as fuel                                                                     |

See Fig. S3 for criteria for the identification of intact dung, burned dung, and decomposition.
